# Supplementary material for: Social isolation delays the positive effects of running on adult neurogenesis
Source: Springer Nature journal article supplement (doi:10.1038/nn1668), 2006-03-12
Supplement: nn1668-S1.pdf [file nn1668-S1.pdf]

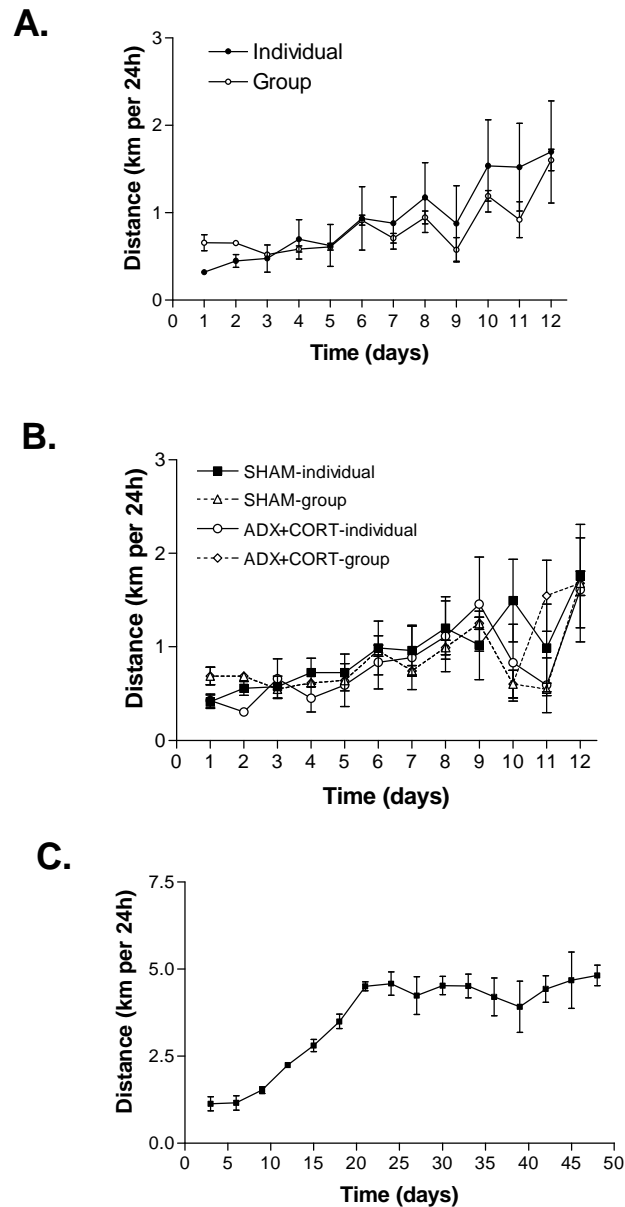

**Supplementary Figure 1. Differences in the amount of running do not explain differences in neurogenesis across housing conditions or glucocorticoid status.** A) Mean 24 hr distances in runners housed alone or in groups are similar. B) No significant difference in mean 24 hr distance was seen between sham-operated animals (SHAM) and those that received adrenalectomy and low-dose corticosterone replacement (ADX + CORT) in either social condition. C) Mean 24 hr distance run plateaus around 21 days. Error bars = s.e.m.
